# Supplementary material
Source: PubMed Central journal article supplement (PMC9340013)

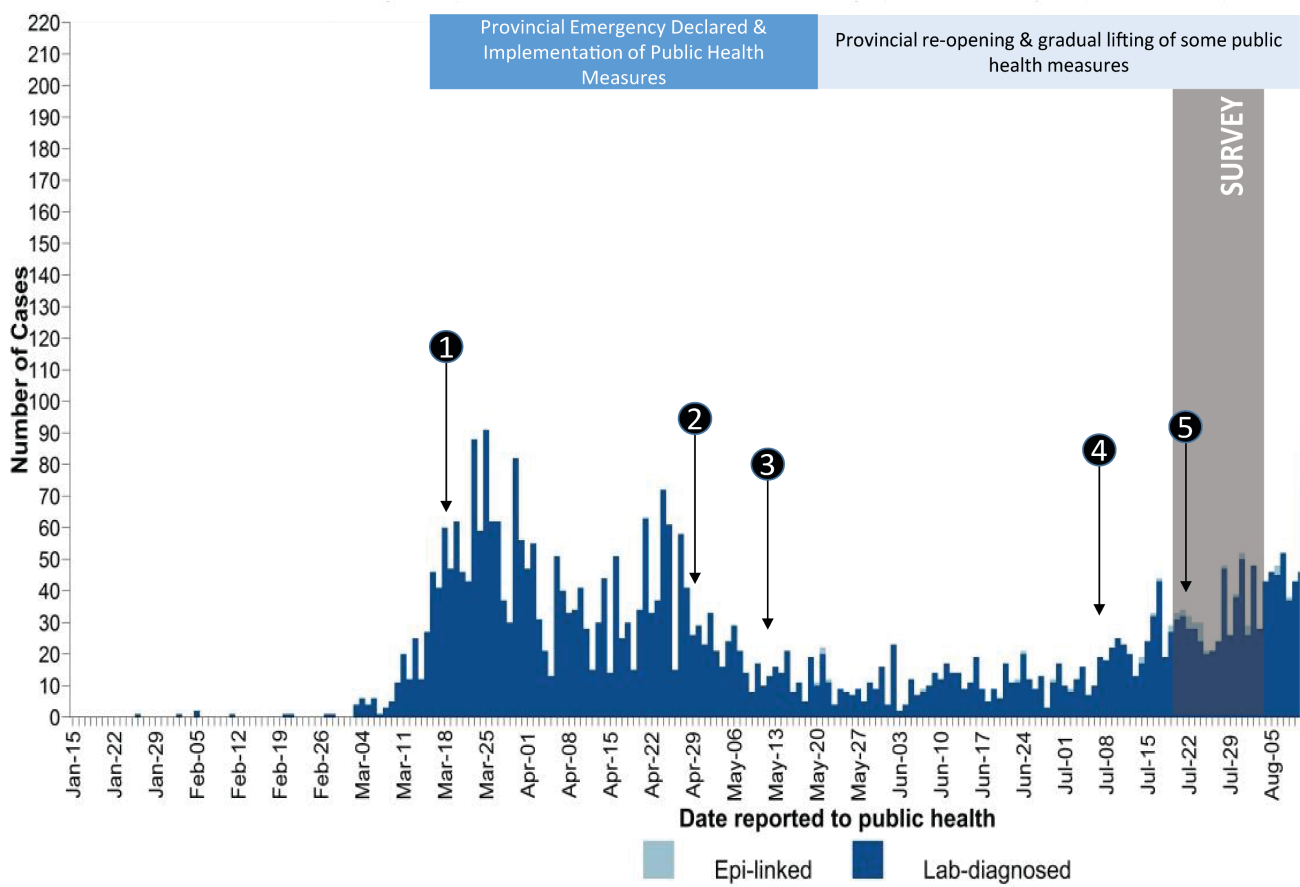

Supplement: sextrans-2021-055013supp001.pdf [file sextrans-2021-055013supp001.pdf]
